# Supplementary material
Source: PubMed Central journal article supplement (PMC3526097)
Supplement: gmb-35-874-s001.pdf [file gmb-35-874-s001.pdf]

**Table S1** - List of the 105 taxa of the genus *Larus* used in the phylogenetic analysis. The genus *Rissa* was used to root the tree.

The accession numbers are from GenBank.

AB208758.1| *Larus canus*

AB208757.1| *Larus canus*

AB208756.1| *Larus canus*

AB208754.1| *Larus crassirostris*

AB208753.1| *Larus crassirostris*

EF513630.1| *Larus argentatus*

EF513629.1| *Larus argentatus*

EF513628.1| *Larus argentatus*

EF513627.1| *Larus argentatus*

EF513626.1| *Larus cachinnans*

EF513625.1| *Larus argentatus*

EF513624.1| *Larus cachinnan*

EF513623.1| *Larus cachinnans*

EF373138.1| *Larus marinus*

AY964952.1| *Larus hemprichii*

AY964949.1| *Larus relictus*

AY964948.1| *Larus saundersi*

AY964947.1| *Larus maculipennis*

AY964946.1| *Larus bulleri*

AY964945.1| *Larus novaehollandiae*

AY964944.1| *Larus hartlaubii*

AY964943.1| *Larus brunnicephalus*

AY964942.1| *Larus armenicus*

AY964941.1| *Larus cachinnan*

AY964940.1| *Larus glaucescens*

AY964939.1| *Larus leucophthalmus*

AY964938.1| *Larus modestus*

AY964937.1| *Larus crassirostris*

AY964936.1| *Larus atlanticus*

AY964935.1| *Larus belcheri*

AY964934.1| *Larus pacificus*

AY615706.1| *Larus thayeri*

AY615705.1| *Larus thayeri*

AY615704.1| *Larus thayeri*

AY615703.1| *Larus glaucescens*

AY615702.1| *Larus glaucescens*

AY615701.1| *Larus glaucescens*

AY615700.1| *Larus glaucescens*

AY615699.1| *Larus occidentalis*  
AY615698.1| *Larus occidentalis wymani*  
AY615697.1| *Larus occidentalis wymani*  
AY615696.1| *Larus occidentalis occidentalis*  
AY615695.1| *Larus occidentalis occidentalis*  
AY615694.1| *Larus occidentalis occidentalis*  
AJ508148.1| *Larus schistisagus*  
AJ508147.1| *Larus occidentalis*  
AJ508145.1| *Larus michahellis*  
AJ508144.1| *Larus michahellis*  
AJ508091.1| *Larus argentatus*  
AJ508092.1| *Larus argentatus argenteus*  
AJ508094.1| *Larus argentatus argenteus*  
AJ508095.1| *Larus argentatus argenteus*  
AJ508096.1| *Larus argentatus argenteus*  
AJ508097.1| *Larus argentatus argenteus*  
AJ508098.1| *Larus argentatus argenteus*  
AJ508099.1| *Larus argentatus argenteus*  
AJ508100.1| *Larus argentatus argenteus*  
AJ508103.1| *Larus argentatus smithsonianus*  
AJ508104.1| *Larus argentatus smithsonianus*  
AJ508122.1| *Larus fuscus fuscus*  
AJ508105.1| *Larus argentatus smithsonianus*  
AJ508106.1| *Larus argentatus smithsonianus*  
AJ508107.1| *Larus argentatus smithsonianus*  
AJ508108.1| *Larus argentatus smithsonianus*  
AJ508109.1| *Larus argentatus smithsonianus*  
AJ508110.1| *Larus armenicus*  
AJ508111.1| *Larus cachinnans barabensis*  
AJ508112.1| *Larus cachinnans barabensis*  
AJ508113.1| *Larus cachinnans barabensis*  
AJ508114.1| *Larus cachinnans*  
AJ508115.1| *Larus cachinnans*  
AJ508116.1| *Larus cachinnans*  
AJ508117.1| *Larus cachinnans*  
AJ508118.1| *Larus cachinnans*  
AJ508119.1| *Larus cachinnans*  
AJ508120.1| *Larus cachinnans*  
AJ508121.1| *Larus dominicanus*  
AJ508143.1| *Larus michahellis*

AJ508142.1| *Larus michahellis*  
AJ508141.1| *Larus michahellis atlantis*  
AJ508140.1| *Larus marinus*  
AJ508138.1| *Larus hyperboreus*  
AJ508123.1| *Larus fuscus fuscus*  
AJ508124.1| *Larus fuscus fuscus*  
AJ508125.1| *Larus fuscus graellsii*  
AJ508126.1| *Larus fuscus graellsii*  
AJ508128.1| *Larus fuscus graellsii*  
AJ508129.1| *Larus fuscus graellsii*  
AJ508130.1| *Larus fuscus heuglini*  
AJ508131.1| *Larus fuscus intermedius*  
AJ508139.1| *Larus hyperboreus*  
AJ508136.1| *Larus hyperboreus*  
AJ508135.1| *Larus hyperboreus*  
AJ508137.1| *Larus hyperboreus*  
AJ508134.1| *Larus glaucoides*  
AJ508133.1| *Larus glaucoide*  
AJ508132.1| *Larus fuscus taimyrensis*  
AJ508127.1| *Larus fuscus graellsii*  
Nc006007 | *Larus dominicanus*  
AY293619| *Larus dominicanus*  
AJ508121| *Larus dominicanus*  
AF268497| *Larus dominicanus*  
AF 444259| *Larus dominicanus*  
DQ385229| *Rissa tridactyla*  
AF268523| *Rissa brevirostris*
